# Supplementary material
Source: publisher site journal article supplement (https://www.dovepress.com/article/311100)
Supplement: Supplementary file 1 [file get_supplementary_file.php]

## Supplementary material

### Long Stay Patients in PICU Follow Up

This is a Follow Up for the Long Stay Patients in your PICU that was conducted in 2014.

**This is only a 5 questions survey to follow up for the Long Stay Patients in your PICU that was conducted in 2014.**

**Long Stay Patients was defined as any child who remained 21 days or more at your PICU at the time of this data collection. Your answers will help our PICUs in Riyadh to understand the problems and solutions further, and you will be acknowledged in the publication, as per your preference.**

**Completing the survey includes the participant's consent to participate in this IRB-Approved research and to publish the results.**

#### **IRB approval #13/3793/IRB**

1. As of today, how many patients do you have in your PICU who stayed 21 days or more?

2. What is the total active bed capacity of your PICU currently?

3. In the previous 5 years, in your expert opinion, what were the main reasons of change in your Unit's number of long stay patients?

(examples: discharge/transfer policies, case management personnel, outsourcing, ... etc)

(Please inform us as much as possible, and if you prefer you can send us Whatsapp voice message)

4. From your PICU experience, how did you manage to address the issues of having long stay patients during the previous 5 years? Did you introduce new modalities to specifically help in this regards?

(Please inform us as much as possible, and if you prefer you can send us a voice message)

5. Did you notice any issues that positively impacted your Long Stay Patients in the last 5 years?

(Please inform us as much as possible, and if you prefer you can send us a voice message)

6. Did you notice any issues that negatively impacted your Long Stay Patients?

(Please inform us as much as possible, and if you prefer you can send us a voice message)

7. We would like to acknowledge your valuable support to this multi-center efforts.

How would you prefer us to add your name in the Acknowledgment?

Prefer to remain anonymous

Your good Name spelling:

8. 2014 data

Original Excel Hospital #

LSP in 2014

2014 PICU bed capacity

Presence of Home Ventilation  
Program in the same hospital
